# Supplementary material for: MetHoS: a platform for large-scale processing, storage and analysis of metabolomics data
Source: PubMed Central journal article supplement (PMC9270834; doi:10.1186/s12859-022-04793-w), 2022-07-08
Supplement: 12859_2022_4793_MOESM4_ESM.pdf [file 12859_2022_4793_MOESM4_ESM.pdf]

Table S1: List of the parameters and their values that are used currently in the KNIME workflows for assembling the metabolite features.

| <b>Parameter</b> \ <b>Workflow</b> | <b>Lenient</b> | <b>Default/MS2 Spectral Matching</b> | <b>Strict</b> |
|------------------------------------|----------------|--------------------------------------|---------------|
| noise_threshold_int                | 8              | 10                                   | 12            |
| chrom_peak_snr                     | 2              | 3                                    | 3             |
| chrom_fwhm                         | 10             | 8                                    | 3             |
| trace_termination_criterion        | sample_rate    | sample_rate                          | sample_rate   |
| mtd: min_trace_length              | 2              | 3                                    | 3             |
| mtd: max_trace_length              | -1             | -1                                   | 400           |
| mtd: mass_error                    | 12             | 10                                   | 8             |
| width_filtering                    | off            | off                                  | auto          |
| report_convex_hulls                | true           | true                                 | true          |
