# Supplementary material for: MetHoS: a platform for large-scale processing, storage and analysis of metabolomics data
Source: PubMed Central journal article supplement (PMC9270834; doi:10.1186/s12859-022-04793-w), 2022-07-08
Supplement: 12859_2022_4793_MOESM5_ESM.pdf [file 12859_2022_4793_MOESM5_ESM.pdf]

Table S2: List of the parameters and their values that are used currently in the KNIME workflows for the map alignment (correcting retention time distortions between maps).

| <b>Parameter</b> \ <b>Workflow</b> | <b>Lenient</b> | <b>Default/MS2 Spectral Matching</b> | <b>Strict</b> |
|------------------------------------|----------------|--------------------------------------|---------------|
| max_num_peaks_considered           | -1             | -1                                   | -1            |
| mz_pair_max_distance               | 0.005          | 0.005                                | 0.005         |
| num_used_points                    | 10000          | 10000                                | 10000         |
| distance_RT → max_difference       | 30             | 20                                   | 10            |
| distance_MZ → max_difference       | 20             | 20                                   | 20            |
| distance_MZ → unit                 | ppm            | ppm                                  | ppm           |
