# Supplementary material for: MetHoS: a platform for large-scale processing, storage and analysis of metabolomics data
Source: PubMed Central journal article supplement (PMC9270834; doi:10.1186/s12859-022-04793-w), 2022-07-08
Supplement: 12859_2022_4793_MOESM6_ESM.pdf [file 12859_2022_4793_MOESM6_ESM.pdf]

Table S3: List of the parameters and their values that are used in the KNIME workflows for grouping corresponding features from multiple maps.

| <b>Parameter</b>             | <b>Value</b> |
|------------------------------|--------------|
| distance_RT → max_difference | 40           |
| distance_MZ → max_difference | 20           |
| distance_MZ → unit           | ppm          |
