# Supplementary material for: MetHoS: a platform for large-scale processing, storage and analysis of metabolomics data
Source: PubMed Central journal article supplement (PMC9270834; doi:10.1186/s12859-022-04793-w), 2022-07-08
Supplement: 12859_2022_4793_MOESM7_ESM.pdf [file 12859_2022_4793_MOESM7_ESM.pdf]

Table S4: The study identifiers from the 38 studies of the MetaboLights repository that were used for processing and analysis.

| <b>Study identifier</b> | <b>Experiments chosen<br/>for PCA</b> | <b>Experiments chosen<br/>for Pearson</b> |
|-------------------------|---------------------------------------|-------------------------------------------|
| MTBLS28                 |                                       |                                           |
| MTBLS87                 |                                       |                                           |
| MTBLS88                 |                                       |                                           |
| MTBLS103                |                                       |                                           |
| MTBLS127                |                                       |                                           |
| MTBLS140                |                                       |                                           |
| MTBLS198                |                                       |                                           |
| MTBLS213                |                                       |                                           |
| MTBLS233                |                                       |                                           |
| MTBLS234                |                                       |                                           |
| MTBLS263                | x                                     |                                           |
| MTBLS264                | x                                     |                                           |
| MTBLS265                | x                                     | x                                         |
| MTBLS266                | x                                     | x                                         |
| MTBLS267                | x                                     | x                                         |
| MTBLS277                |                                       |                                           |
| MTBLS307                | x                                     |                                           |
| MTBLS315                |                                       |                                           |
| MTBLS321                |                                       |                                           |
| MTBLS354                |                                       |                                           |
| MTBLS401                |                                       |                                           |
| MTBLS404                |                                       |                                           |
| MTBLS413                |                                       |                                           |
| MTBLS414                |                                       |                                           |
| MTBLS417                |                                       |                                           |
| MTBLS423                |                                       |                                           |
| MTBLS449                |                                       |                                           |
| MTBLS473                |                                       |                                           |
| MTBLS476                |                                       |                                           |
| MTBLS549                |                                       |                                           |
| MTBLS558                |                                       |                                           |
| MTBLS620                |                                       |                                           |
| MTBLS721                |                                       |                                           |
| MTBLS729                |                                       |                                           |
| MTBLS739                |                                       |                                           |
| MTBLS749                |                                       |                                           |
| MTBLS842                |                                       |                                           |
| MTBLS916                |                                       |                                           |
