# Supplementary material for: MetHoS: a platform for large-scale processing, storage and analysis of metabolomics data
Source: PubMed Central journal article supplement (PMC9270834; doi:10.1186/s12859-022-04793-w), 2022-07-08
Supplement: 12859_2022_4793_MOESM8_ESM.pdf [file 12859_2022_4793_MOESM8_ESM.pdf]

Table S5: List of clusters and number of experiments in each one.

| <b>Cluster</b> | <b>No experiments</b> |
|----------------|-----------------------|
| cluster1       | 1958                  |
| cluster2       | 13                    |
| cluster3       | 7                     |
| cluster4       | 137                   |
| cluster5       | 137                   |
| cluster6       | 2                     |
| cluster7       | 1                     |
| cluster8       | 35                    |
| cluster9       | 21                    |
| cluster10      | 19                    |
| cluster11      | 1                     |
| cluster12      | 1                     |
| cluster13      | 37                    |
| cluster14      | 2451                  |
| cluster15      | 7                     |
