# Supplementary material for: MetHoS: a platform for large-scale processing, storage and analysis of metabolomics data
Source: PubMed Central journal article supplement (PMC9270834; doi:10.1186/s12859-022-04793-w), 2022-07-08
Supplement: 12859_2022_4793_MOESM9_ESM.pdf [file 12859_2022_4793_MOESM9_ESM.pdf]

Table S6: List of clusters and number of experiments in each one.

| <b>Cluster</b>      | <b>No experiments</b> |
|---------------------|-----------------------|
| <b>CLUSTER 1</b>    |                       |
| ARPE-19-cell        | 2                     |
| Blood-Plasma        | 330                   |
| Blood-Serum         | 225                   |
| Blood               | 142                   |
| THP-1-cell          | 28                    |
| Urine               | 649                   |
| Beath               | 38                    |
| Renal-Tubule        | 62                    |
| Lung                | 130                   |
| Erythrocyte         | 28                    |
| Feces               | 18                    |
| C2C12               | 9                     |
| Cerebrospinal-fluid | 207                   |
| Solvent             | 88                    |
| Pure Substance      | 2                     |
| <b>CLUSTER 2</b>    |                       |
| Solvent             | 13                    |
| <b>CLUSTER 3</b>    |                       |
| Urine               | 7                     |
| <b>CLUSTER 4</b>    |                       |
| Blood-Serum         | 137                   |
| <b>CLUSTER 5</b>    |                       |
| Solvent             | 51                    |
| Urine               | 86                    |
| <b>CLUSTER 6</b>    |                       |
| Urine               | 2                     |
| <b>CLUSTER 7</b>    |                       |
| Urine               | 1                     |
| <b>CLUSTER 8</b>    |                       |
| Urine               | 35                    |
| <b>CLUSTER 9</b>    |                       |
| Solvent             | 21                    |
| <b>CLUSTER 10</b>   |                       |
| Blood-Plasma        | 19                    |
| <b>CLUSTER 11</b>   |                       |
| Urine               | 1                     |
| <b>CLUSTER 12</b>   |                       |
| Urine               | 1                     |
| <b>CLUSTER 13</b>   |                       |
| Urine               | 37                    |

| Cluster                              | No experiments |
|--------------------------------------|----------------|
| <b>CLUSTER 14</b>                    |                |
| ARPE-19-cell                         | 2              |
| Blood-Plasma                         | 784            |
| Blood-Serum                          | 42             |
| Blood                                | 1              |
| Cerebrospinal-fluid                  | 47             |
| Erythrocyte                          | 2              |
| Feces                                | 10             |
| Lung                                 | 128            |
| MCF-10A-cell                         | 62             |
| Pure-Substance                       | 50             |
| Renal-Tubule                         | 94             |
| Solvent                              | 1              |
| Umbilical vein endothelial cell line | 15             |
| Urine                                | 1213           |
| <b>CLUSTER 15</b>                    |                |
| Urine                                | 7              |
