# Supplementary material for: MetHoS: a platform for large-scale processing, storage and analysis of metabolomics data
Source: PubMed Central journal article supplement (PMC9270834; doi:10.1186/s12859-022-04793-w), 2022-07-08
Supplement: 12859_2022_4793_MOESM10_ESM.pdf [file 12859_2022_4793_MOESM10_ESM.pdf]

Table S7: List of the metabolites as they appear in Pearson Correlation heatmap starting from the top left corner.

**Metabolite name**

---

Isovalerylcarnitine  
1-Methyladenosine  
1-Methylguanosine  
1-Methylhistidine  
2-Phosphoglyceric acid  
2,3-Diphosphoglyceric acid  
3-Phosphoglyceric acid  
4-Guanidinobutanoic acid  
4-Trimethylammoniobutanoic acid  
6-Phosphogluconic acid  
7a-Hydroxy-5b-cholanic acid  
acetylcarnosine  
Adenine  
Adenosine  
Adenosine monophosphate  
Adenosine triphosphate  
ADP  
Argininosuccinic acid  
Beta-Glycerophosphoric acid  
Betaine  
Butyrylcarnitine  
Caffeine  
carnosine  
CDP-Ethanolamine  
Chenodeoxycholic acid  
cis-Aconitic acid  
Citicoline  
Citramalic acid  
Citric acid  
citrulline  
creatine  
creatinine  
Cytidine  
Cytidine triphosphate  
D-glucose  
D-Glyceraldehyde 3-phosphate  
D-Sedoheptulose 7-phosphate  
Decanoylcarnitine  
Dimethyl-L-arginine  
Dodecanoylcarnitine

**Metabolite name**

---

Ergothioneine  
Fructose 6-phosphate  
GDP-glucose  
Gluconic acid  
Glucosamine  
Glucose 6-phosphate  
Glutaric acid  
Glyceric acid  
Glycerophosphocholine  
Guanosine diphosphate  
Guanosine monophosphate  
Guanosine triphosphate  
Hexanoylcarnitine  
Hippuric acid  
Hypoxanthine  
Indoxyl sulfate  
L-Acetylcarnitine  
L-Arginine  
L-Asparagine  
L-Aspartic acid  
L-Carnitine  
L-Glutamic acid  
L-Glutamine  
L-Histidine  
L-isoleucine  
L-Kynurenine  
L-leucine  
L-Lysine  
L-Methionine  
L-Octanoylcarnitine  
L-Phenylalanine  
L-Proline  
L-Serine  
L-Threonine  
L-Tryptophan  
L-Tyrosine  
L-Valine  
Malic acid  
myoInositol  
N(6)-Methyllysine  
N-a-Acetyl-L-arginine  
N-Acetyl-D-glucosamine  
N-Acetyl-L-aspartic acid

**Metabolite name**

---

N-Acetylglutamic acid  
N-Acetylornithine  
N2\_N2-Dimethylguanosine  
N6-acetyl-L-lysine  
N6\_N6\_N6-Trimethyl-L-lysine  
NAD  
NADP  
Ne\_Ne dimethyllysine  
Niacinamide  
ophthalmic acid  
ornithine  
Oxoglutaric acid  
Pantothenic acid  
Phosphocreatine  
Propionylcarnitine  
Quinolinic acid  
S-Adenosylhomocysteine  
S-Adenosylmethionine  
Succinic acid  
taurine  
Tetradecanoylcarnitine  
Uric acid  
uridine  
Uridine 5'-monophosphate  
Uridine diphosphate glucose  
Uridine diphosphate glucuronic acid  
Uridine diphosphate-N-acetylglucosamine  
Uridine triphosphate  
xanthine

---
