# Supplementary material for: MetHoS: a platform for large-scale processing, storage and analysis of metabolomics data
Source: PubMed Central journal article supplement (PMC9270834; doi:10.1186/s12859-022-04793-w), 2022-07-08
Supplement: 12859_2022_4793_MOESM11_ESM.pdf [file 12859_2022_4793_MOESM11_ESM.pdf]

Table S8: Clusters of the metabolites of 45 experiments originating of 15 young individuals.

**Metabolite name**

---

**CLUSTER 1**

---

1-Methyladenosine  
1-Methylguanosine  
1-Methylhistidine  
4-Guanidinobutanoic acid  
4-Trimethylammoniobutanoic acid  
6-Phosphogluconic acid  
7a-Hydroxy-5b-cholanic acid  
Acetylcarnosine  
Adenine  
Argininosuccinic acid  
Beta-Glycerophosphoric acid  
Betaine  
Butyrylcarnitine  
Carnosine  
CDP-Ethanolamine  
Chenodeoxycholic acid  
cis-Aconitic acid  
Citramalic acid  
Citric acid  
Citrulline  
Creatinine  
Cytidine  
Cytidine triphosphate  
D-Glyceraldehyde 3-phosphate  
D-Sedoheptulose 7-phosphate  
Dimethyl-L-arginine  
Dodecanoylcarnitine  
Fructose 6-phosphate  
GDP-glucose  
Gluconic acid  
Glucosamine  
Glucose 6-phosphate  
Glutaric acid  
Glyceric acid  
Guanosine diphosphate  
Guanosine monophosphate  
Hexanoylcarnitine  
Hippuric acid  
Hypoxanthine

**Metabolite name**

---

Isovalerylcarnitine  
L-Asparagine  
L-Aspartic acid  
L-Histidine  
L-Isoleucine  
L-Kynurenine  
L-Leucine  
L-Lysine  
L-Methionine  
L-Octanoylcarnitine  
L-Proline  
L-Threonine  
L-Tyrosine  
L-Valine  
Malic acid  
N(6)-Methyllysine  
N-Acetyl-D-glucosamine  
N-Acetyl-L-aspartic acid  
N-Acetylglutamic acid  
N-Acetylornithine  
N2\_N2-Dimethylguanosine  
N6-Acetyl-L-lysine  
Ne\_Ne dimethyllysine  
Niacinamide  
Ophthalmic acid  
Ornithine  
Oxoglutaric acid  
Pantothenic acid  
Phosphocreatine  
Quinolinic acid  
S-Adenosylhomocysteine  
S-Adenosylmethionine  
Succinic acid  
Tetradecanoylcarnitine  
Uridine  
Uridine 5'-monophosphate  
Uridine diphosphate glucuronic acid  
Uridine triphosphate  
Xanthine

---

**CLUSTER 2**

---

2,3-Diphosphoglyceric acid

---

**CLUSTER 3**

---

ADP

---

**Metabolite name**

---

NAD

---

**CLUSTER 4**

---

Adenosine triphosphate

---

**CLUSTER 5**

---

2-Phosphoglyceric acid

3-Phosphoglyceric acid

Guanosine triphosphate

NADP

Uridine diphosphate glucose

---

**CLUSTER 6**

---

Ergothioneine

---

**CLUSTER 7**

---

Decanoylcarnitine

---

**CLUSTER 8**

---

L-Carnitine

---

**CLUSTER 9**

---

Adenosine

Adenosine monophosphate

Caffeine

Citicoline

Creatine

D-Glucose

Glycerophosphocholine

Indoxyl sulfate

L-Arginine

L-Glutamic acid

L-Glutamine

L-Phenylalanine

L-Serine

L-Tryptophan

Myoinositol

N-a-Acetyl-L-arginine

N6\_N6\_N6-Trimethyl-L-lysine

Propionylcarnitine

Taurine

Uric acid

Uridine diphosphate-N-acetylglucosamine

---

**CLUSTER 10**

---

L-Acetylcarnitine

---
